# Supplementary material for: Plant Tissues as 3D Natural Scaffolds for Adipose, Bone and Tendon Tissue Regeneration
Source: PubMed Central journal article supplement (PMC7344190; doi:10.3389/fbioe.2020.00723), 2020-06-30
Supplement: Image_1.pdf [file Image_1.pdf]

# Plant Tissues as 3D Natural Scaffolds for Adipose, Bone and Tendon Tissue Regeneration

## Supplementary Material

### Supplementary Data

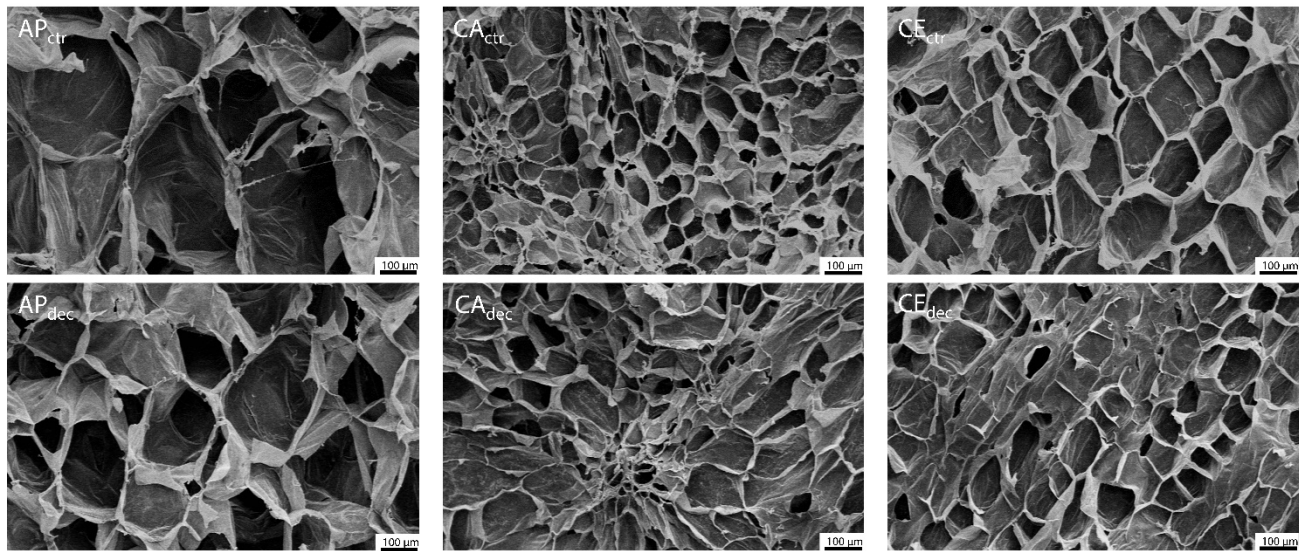

**Supplementary Data 1:** SEM micrographs of apple (AP<sub>ctr</sub>), carrot (CA<sub>ctr</sub>) and celery (CE<sub>ctr</sub>) in comparison to decellularized apple (AP<sub>dec</sub>), carrot (CA<sub>dec</sub>) and celery-derived (CE<sub>dec</sub>) scaffolds; scale bar: 100 μm.

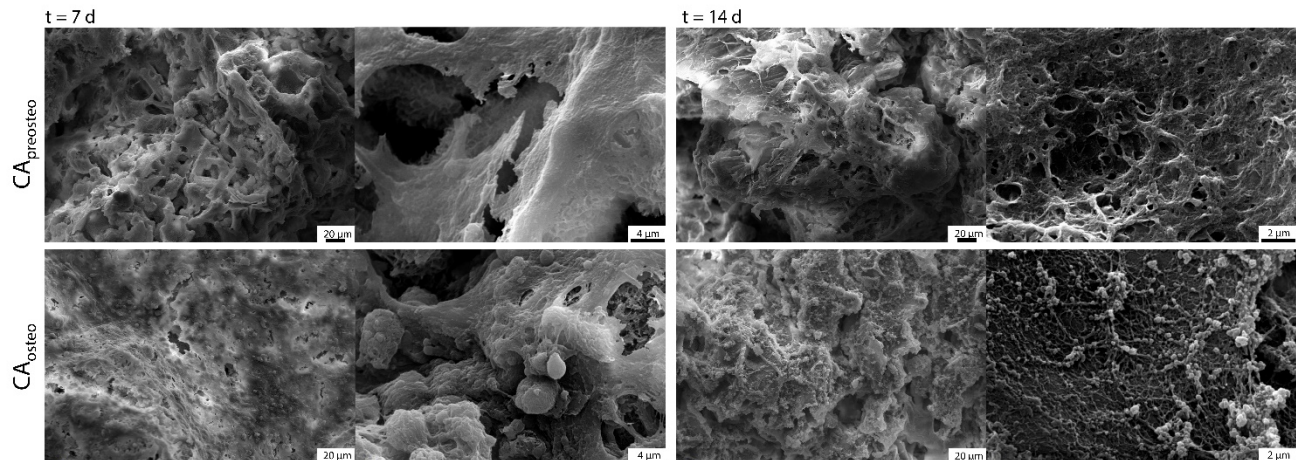

**Supplementary Data 2:** SEM micrographs of osteogenic-differentiated ( $CA_{\text{osteo}}$ ) and non-differentiated ( $CA_{\text{preosteo}}$ ) MC3T3-E1 cells cultured for  $t = 7$  and 14 days on carrot-derived scaffolds. After 14 days of culture, a uniform colonization was observed on both differentiation-induced and non-induced scaffolds. Scale bar left micrographs: 20  $\mu\text{m}$ , scale bar right micrographs: 4  $\mu\text{m}$  ( $t = 7$  d) and 2  $\mu\text{m}$  ( $t = 14$  d).

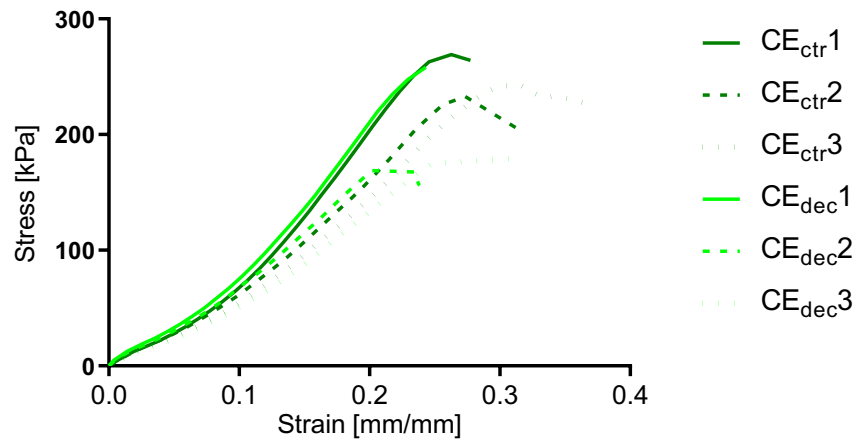

**Supplementary Data 3:** Representative tensile mechanical stress/strain curves at failure of decellularized ( $CE_{\text{dec}}$ ) and control ( $CE_{\text{ctr}}$ ) celery samples.
